# Supplementary material
Source: PubMed Central journal article supplement (PMC2756351)
Supplement: mmc1.pdf [file mmc1.pdf]

Biophysical Journal, Volume 97

**Supporting Material**

**Modeling cardiac action potential shortening driven by oxidative stress-induced mitochondrial oscillations**

Lufang Zhou, Sonia Cortassa, An-Chi Wei, Miguel A Aon, Raimond L. Winslow, and Brian O'Rourke

## Supplemental materials: ECME-RIRR model equations and parameters

### S1. Model equations

#### S1.1 Sarcolemmal membrane ionic currents

*Fast Na<sup>+</sup> current (I<sub>Na</sub>)*

|                                                                                                                              |     |
|------------------------------------------------------------------------------------------------------------------------------|-----|
| $I_{Na} = \bar{G}_{Na} m^3 h j (V - E_{Na})$                                                                                 | E1  |
| $E_{Na} = \frac{RT}{F} \ln \left( \frac{[Na^+]_o}{[Na^+]_i} \right)$                                                         | E2  |
| $\frac{dm_{Na}}{dt} = \alpha_m (1 - m_{Na}) - \beta_m m_{Na}$                                                                | E3  |
| $\frac{dh_{Na}}{dt} = \alpha_h (1 - h_{Na}) - \beta_h h_{Na}$                                                                | E4  |
| $\frac{dj_{Na}}{dt} = \alpha_j (1 - j_{Na}) - \beta_j j_{Na}$                                                                | E5  |
| $\alpha_m = 0.32 \frac{V + 47.13}{1 - e^{-0.1(V+47.13)}}$                                                                    | E6  |
| $\beta_m = 0.08 e^{-V/11}$                                                                                                   | E7  |
| For V ≥ -40 mV                                                                                                               |     |
| $\alpha_h = 0.0$                                                                                                             | E8  |
| $\alpha_j = 0.0$                                                                                                             | E9  |
| $\beta_h = \left( 0.13 \left( 1 + e^{\left( \frac{V+10.66}{-11.1} \right)} \right) \right)^{-1}$                             | E10 |
| $\beta_j = 0.3 \frac{e^{-2.535 \times 10^{-7} V}}{1 + e^{-0.1(V+32)}}$                                                       | E11 |
| For V < -40 mV                                                                                                               |     |
| $\alpha_h = 0.135 e^{\frac{80 + V}{-6.8}}$                                                                                   | E12 |
| $\alpha_j = \frac{(-127,140 e^{0.2444 V} - 3.474 \times 10^{-5} e^{-0.04391 V}) \times (V + 37.78)}{1 + e^{0.311(V+79.23)}}$ | E13 |
| $\beta_h = 3.56 e^{0.079 V} + 3.1 \times 10^5 e^{0.35 V}$                                                                    | E14 |

$$\beta_j = 0.1212 \frac{e^{-0.01052 V}}{1 + e^{-0.1378 (V+40.14)}} \quad \text{E15}$$

*Time-dependent delayed rectifier  $K^+$  current ( $I_K$ )*

$$I_K = \bar{G}_K X_1 X^2 (V - E_K) \quad \text{E16}$$

$$E_K = \frac{RT}{F} \ln \left( \frac{[K^+]_o + P_{Na,K} [Na^+]_o}{[K^+]_i + P_{Na,K} [Na^+]_i} \right) \quad \text{E17}$$

$$\bar{G}_K = 0.282 \sqrt{\frac{[K^+]_o}{5.4}} \quad \text{E18}$$

$$X_1 = \left( 1 + e^{(V-40)/40} \right)^{-1} \quad \text{E19}$$

$$\frac{dX}{dt} = \alpha_x (1 - X) - \beta_x X \quad \text{E20}$$

$$\alpha_x = 7.19 \cdot 10^{-5} \frac{V + 30}{1 - e^{-0.148(V+30)}} \quad \text{E21}$$

$$\beta_x = 1.31 \cdot 10^{-4} \frac{V + 30}{-1 + e^{0.0687(V+30)}} \quad \text{E22}$$

*Time-independent  $K^+$  current ( $I_{K1}$ )*

$$I_{K1} = \bar{G}_{K1} K_{1\infty} (V - E_{K1}) \quad \text{E23}$$

$$E_{K1} = \frac{RT}{F} \ln \left( \frac{[K^+]_o}{[K^+]_i} \right) \quad \text{E24}$$

$$\bar{G}_{K1} = 0.75 \sqrt{\frac{[K^+]_o}{5.4}} \quad \text{E25}$$

$$K_{1\infty} = \frac{\alpha_{K1}}{\alpha_{K1} + \beta_{K1}} \quad \text{E26}$$

$$\alpha_{K1} = \frac{1.02}{1 + e^{0.2385(V-E_{K1}-59.215)}} \quad \text{E27}$$

$$\beta_{K1} = \frac{0.4912 e^{0.08032(V-E_{K1}+5.476)} + e^{0.06175(V-E_{K1}-594.31)}}{1 + e^{-0.5143(V-E_{K1}+4.753)}} \quad \text{E28}$$

*Plateau  $K^+$  current ( $I_{Kp}$ )*

|                                                  |     |
|--------------------------------------------------|-----|
| $I_{Kp} = \bar{G}_{Kp} K_p (V - E_{Kp})$         | E29 |
| $E_{Kp} = E_{K1}$                                | E30 |
| $K_p = \left(1 + e^{(7.488-V)/5.98}\right)^{-1}$ | E31 |

*$Na^+/Ca^{2+}$  exchanger current ( $I_{NaCa}$ )*

|                                                                                                                                                                                                                                                                   |     |
|-------------------------------------------------------------------------------------------------------------------------------------------------------------------------------------------------------------------------------------------------------------------|-----|
| $I_{NaCa} = k_{NaCa} \frac{1}{K_{m,Na}^3 + [Na^+]_o^3} \frac{1}{K_{m,Ca} + [Ca^{2+}]_o} \left(1 + k_{sat} e^{(\eta-1)\frac{VF}{RT}}\right)^{-1} \left\{ e^{\eta\frac{VF}{RT}} [Na^+]_i^3 [Ca^{2+}]_o - e^{(\eta-1)\frac{VF}{RT}} [Na^+]_o^3 [Ca^{2+}]_i \right\}$ | E32 |
|-------------------------------------------------------------------------------------------------------------------------------------------------------------------------------------------------------------------------------------------------------------------|-----|

*$Na^+/K^+$  pump current ( $I_{NaK}$ )*

|                                                                                                                                                          |     |
|----------------------------------------------------------------------------------------------------------------------------------------------------------|-----|
| $I_{NaK} = \bar{I}_{NaK} f_{NaK} f_{NaK}^{ATP} \left(1 + \left(\frac{K_{m,Na_i}}{[Na^+]_i}\right)^{1.5}\right)^{-1} \frac{[K^+]_o}{[K^+]_o + K_{m,K_o}}$ | E33 |
| $f_{NaK} = \left(1 + 0.1245 e^{-0.1\frac{VF}{RT}} + 0.0365 e^{-\frac{VF}{RT}} \left(\frac{e^{[Na^+]_o/67.3} - 1}{7}\right)\right)^{-1}$                  | E34 |
| $f_{NaK}^{ATP} = \left(1 + \frac{K_{NaK}^{1,ATP}}{[ATP]_i} \left(1 + \frac{[ADP]_i}{K_{NaK}^{i,ADP}}\right)\right)^{-1}$                                 | E35 |

*Nonspecific  $Ca^{2+}$  activated current ( $I_{ns(Ca)}$ )*

|                                                                                                                       |     |
|-----------------------------------------------------------------------------------------------------------------------|-----|
| $I_{ns(Ca)} = I_{ns(Na)} + I_{ns(K)}$                                                                                 | E36 |
| $I_{ns(Na)} = \bar{I}_{ns(Na)} \left(1 + \left[\frac{K_{m,ns(Ca)}}{[Ca^{2+}]_i}\right]^3\right)^{-1}$                 | E37 |
| $\bar{I}_{ns(Na)} = P_{ns(Na)} \frac{VF^2}{RT} \frac{0.75 \left([Na^+]_i e^{VF/RT} - [Na^+]_o\right)}{e^{VF/RT} - 1}$ | E38 |

$$I_{\text{ns(K)}} = \bar{I}_{\text{ns(K)}} \left( 1 + \left[ \frac{K_{\text{m,ns(Ca)}}}{[\text{Ca}^{2+}]_i} \right]^3 \right)^{-1} \quad \text{E39}$$

$$\bar{I}_{\text{ns(K)}} = P_{\text{ns(K)}} \frac{VF^2}{RT} \frac{0.75 \left( [\text{K}^+]_i e^{VF/RT} - [\text{K}^+]_o \right)}{e^{VF/RT} - 1} \quad \text{E40}$$

*Background Ca<sup>2+</sup> current (I<sub>Ca,b</sub>)*

$$I_{\text{Ca,b}} = \bar{G}_{\text{Ca,b}} (V - E_{\text{Ca,N}}) \quad \text{E41}$$

$$E_{\text{Ca,N}} = \frac{RT}{2F} \ln \left( \frac{[\text{Ca}^{2+}]_o}{[\text{Ca}^{2+}]_i} \right) \quad \text{E42}$$

*Background Na<sup>+</sup> current (I<sub>Na,b</sub>)*

$$I_{\text{Na,b}} = \bar{G}_{\text{Na,b}} (V - E_{\text{Na,N}}) \quad \text{E43}$$

$$E_{\text{Na,N}} = E_{\text{Na}} \quad \text{E44}$$

*Sarcolemmal Ca<sup>2+</sup> pump current (I<sub>pCa</sub>)*

$$I_{\text{pCa}} = I_{\text{pCa,max}} F_{\text{pCa}}^{\text{ATP}} \frac{[\text{Ca}^{+2}]_i}{K_{\text{m}}^{\text{pCa}} + [\text{Ca}^{+2}]_i} \quad \text{E45}$$

$$F_{\text{pCa}}^{\text{ATP}} = \left( 1 + \frac{K_{\text{m1-pCa}}^{\text{ATP}}}{[\text{ATP}]_i} \left( 1 + \frac{[\text{ADP}]_i}{K_{\text{i-pCa}}^{\text{ADP}}} \right) \right)^{-1} + \left( 1 + \frac{K_{\text{m2-pCa}}^{\text{ATP}}}{[\text{ATP}]_i} \right)^{-1} \quad \text{E46}$$

*SERCA pump (J<sub>up</sub>)*

$$J_{\text{up}} = \frac{V_{\text{maxf}} f_{\text{b}} - V_{\text{maxr}} r_{\text{b}}}{1 + f_{\text{b}} + r_{\text{b}}} f_{\text{ATP}}^{\text{SERCA}} \quad \text{E47}$$

$$f_{\text{b}} = \left( \frac{[\text{Ca}^{2+}]_i}{K_{\text{fb}}} \right)^{\text{Nfb}} \quad \text{E48}$$

$$r_{\text{b}} = \left( \frac{[\text{Ca}^{2+}]_{\text{NSR}}}{K_{\text{rb}}} \right)^{\text{Nrb}} \quad \text{E49}$$

$$f_{\text{ATP}}^{\text{SERCA}} = \left( \frac{K_{\text{m,up}}^{\text{ATP}}}{[\text{ATP}]_i} \cdot \left( 1 + \frac{[\text{ADP}]_i}{K_{i,\text{up}}} \right) + \left[ 1 + \frac{[\text{ADP}]_i}{K'_{i,\text{up}}} \right] \right)^{-1} \quad \text{E50}$$

*L-type Ca<sup>2+</sup> current (I<sub>Ca</sub>)*

$$\alpha = 0.4 e^{(V+2)/10} \quad \text{E51}$$

$$\beta = 0.05 e^{-(V+2)/13} \quad \text{E52}$$

$$\alpha' = a \alpha \quad \text{E53}$$

$$\beta' = \frac{\beta}{b} \quad \text{E54}$$

$$\gamma = 0.1875 [\text{Ca}^{2+}]_{\text{ss}} \quad \text{E55}$$

$$\frac{dC_o}{dt} = \beta C_1 + \omega C_{\text{CaO}} - (4\alpha + \gamma)C_o \quad \text{E56}$$

$$\frac{dC_1}{dt} = 4\alpha C_o + 2\beta C_2 + \frac{\omega}{b} C_{\text{Ca1}} - (\beta + 3\alpha + a\gamma)C_1 \quad \text{E57}$$

$$\frac{dC_2}{dt} = 3\alpha C_1 + 3\beta C_3 + \frac{\omega}{b^2} C_{\text{Ca2}} - (2\beta + 2\alpha + a^2\gamma)C_2 \quad \text{E58}$$

$$\frac{dC_3}{dt} = 2\alpha C_2 + 4\beta C_4 + \frac{\omega}{b^3} C_{\text{Ca3}} - (3\beta + \alpha + a^3\gamma)C_3 \quad \text{E59}$$

$$\frac{dC_4}{dt} = \alpha C_3 + g O + \frac{\omega}{b^4} C_{\text{Ca4}} - (4\beta + f + a^4\gamma)C_4 \quad \text{E60}$$

$$\frac{dO}{dt} = f C_4 - g O \quad \text{E61}$$

$$\frac{dC_{\text{Ca0}}}{dt} = \beta' C_{\text{Ca1}} + \gamma C_o - (4\alpha' + \omega) C_{\text{Ca0}} \quad \text{E62}$$

$$\frac{dC_{\text{Ca1}}}{dt} = 4\alpha' C_{\text{Ca0}} + 2\beta' C_{\text{Ca2}} + a\gamma C_1 - \left( \beta' + 3\alpha' + \frac{\omega}{b} \right) C_{\text{Ca1}} \quad \text{E63}$$

$$\frac{dC_{\text{Ca2}}}{dt} = 3\alpha' C_{\text{Ca1}} + 3\beta' C_{\text{Ca3}} + a^2\gamma C_2 - \left( 2\beta' + 2\alpha' + \frac{\omega}{b^2} \right) C_{\text{Ca2}} \quad \text{E64}$$

$$\frac{dC_{\text{Ca3}}}{dt} = 2\alpha' C_{\text{Ca2}} + 4\beta' C_{\text{Ca4}} + a^3\gamma C_3 - \left( 3\beta' + \alpha' + \frac{\omega}{b^3} \right) C_{\text{Ca3}} \quad \text{E65}$$

$$\frac{dC_{Ca4}}{dt} = \alpha' C_{Ca3} + g' O_{Ca} + a^4 \gamma C_4 - \left( 4\beta' + f' + \frac{\omega}{b^4} \right) C_{Ca4} \quad E66$$

$$\frac{dO_{Ca}}{dt} = f' C_{Ca4} - g' O_{Ca} \quad E67$$

$$I_{Ca_{max}} = 4 \bar{P}_{Ca} \frac{VF^2}{RT} \frac{0.001 e^{2VF/RT} - 0.341 [Ca^{2+}]_o}{e^{2V/RT} - 1} \quad E68$$

$$I_{Ca} = 6 I_{Ca_{max}} y [O] \quad E69$$

$$I_{Ca,K} = P'_K y [O + O_{Ca}] \frac{VF^2}{RT} \frac{[K^+]_i e^{VF/RT} - [K^+]_o}{e^{VF/RT} - 1} \quad E70$$

$$P'_K = \frac{\bar{P}_K}{1 + \frac{I_{Ca_{max}}}{I_{Ca_{half}}}} \quad E71$$

$$\frac{dy}{dt} = \frac{y_\infty - y}{\tau_y} \quad E72$$

$$y_\infty = \frac{1}{1 + e^{(V+55)/7.5}} + \frac{0.5}{1 + e^{(-V+21)/6}} \quad E73$$

$$\tau_y = 20 + \frac{600}{1 + e^{(V+30)/9.5}} \quad E74$$

*Sarcolemmal membrane potential*

$$\frac{dV}{dt} = -\frac{1}{C_m} \left( \begin{array}{l} I_{Na} + I_{Ca} + I_{Ca,K} + I_K + I_{K1} + I_{Kp} + I_{NaCa} \\ + I_{NaK} + I_{ins(Ca)} + I_{pCa} + I_{Ca,b} + I_{Na,b} + I_{K,ATP} \end{array} \right) \quad E80$$

**S1.2. Ca<sup>2+</sup> handling system**

*Ca<sup>2+</sup> Release channel current (J<sub>rel</sub>)*

$$\frac{dP_{C1}}{dt} = -k_a^+ [Ca^{2+}]_{ss}^n P_{C1} + k_a^- P_{O1} \quad E75$$

$$\begin{aligned} \frac{dP_{O1}}{dt} = & k_a^+ [Ca^{2+}]_{ss}^n P_{C1} - k_a^- P_{O1} - k_b^+ [Ca^{2+}]_{ss}^m P_{O1} \\ & + k_b^- P_{O2} - k_c^+ P_{O1} + k_c^- P_{C2} \end{aligned} \quad E76$$

---


$$\frac{dP_{O_2}}{dt} = k_b^+ [Ca^{2+}]_{SS}^m P_{O_1} - k_b^- P_{O_2} \quad E77$$


---

$$\frac{dP_{C_2}}{dt} = k_c^+ P_{O_1} - k_c^- P_{C_2} \quad E78$$


---

$$J_{rel} = v_1 (P_{O_1} + P_{O_2}) ([Ca^{2+}]_{JSR} - [Ca^{2+}]_{SS}) \quad E79$$


---

*Ca<sup>2+</sup> buffering and diffusive transport between compartments*

---


$$J_{trpn} = \frac{d[HTRPNCa]}{dt} + \frac{d[LTRPNCa]}{dt} \quad E81$$


---

$$J_{tr} = \frac{[Ca^{2+}]_{NSR} - [Ca^{2+}]_{JSR}}{\tau_{tr}} \quad E82$$


---

$$J_{xfer} = \frac{[Ca^{2+}]_{SS} - [Ca^{2+}]_i}{\tau_{xfer}} \quad E83$$


---

$$\beta_i = \left( 1 + \frac{K_m^{CMDN} [CMDN]_{tot}}{(K_m^{CMDN} + [Ca^{2+}]_i)^2} \right)^{-1} \quad E84$$


---

$$\beta_{SS} = \left( 1 + \frac{K_m^{CMDN} [CMDN]_{tot}}{(K_m^{CMDN} + [Ca^{2+}]_{SS})^2} \right)^{-1} \quad E85$$


---

$$\beta_{JSR} = \left( 1 + \frac{K_m^{CSQN} [CSQN]_{tot}}{(K_m^{CSQN} + [Ca^{2+}]_{JSR})^2} \right)^{-1} \quad E86$$


---

$$\frac{d[HTRPNCa]}{dt} = k_{htrpn}^+ [Ca^{2+}]_i ([HTRPN]_{tot} - [HTRPNCa]) - k_{htrpn}^- [HTRPNCa] \quad E87$$


---

$$\frac{d[LTRPNCa]}{dt} = k_{ltrpn}^+ [Ca^{2+}]_i ([LTRPN]_{tot} - [LTRPNCa]) - k_{ltrpn}^- \left( 1 - \frac{2}{3} Force_{Norm} \right) [LTRPNCa] \quad E88$$


---



### S1.3. Ionic concentrations balance equations

$$\frac{d[\text{Ca}^{2+}]_i}{dt} = \beta_i \left[ J_{\text{xfer}} - J_{\text{up}} - J_{\text{trpn}} - \left( I_{\text{Ca,b}} - 2 I_{\text{NaCa}} + I_{\text{pCa}} \right) \frac{A_{\text{cap}}}{2V_{\text{myo}} F} + \left( V_{\text{NaCa}} - V_{\text{uni}} \right) \frac{V_{\text{mito}}}{V_{\text{myo}}} \right] \quad \text{E89}$$

$$\frac{d[\text{Ca}^{2+}]_{\text{ss}}}{dt} = \beta_{\text{ss}} \left[ J_{\text{rel}} \frac{V_{\text{JSR}}}{V_{\text{ss}}} - J_{\text{xfer}} \frac{V_{\text{myo}}}{V_{\text{ss}}} - \left( I_{\text{Ca}} \right) \frac{A_{\text{cap}}}{2V_{\text{ss}} F} \right] \quad \text{E90}$$

$$\frac{d[\text{Ca}^{2+}]_{\text{JSR}}}{dt} = \beta_{\text{JSR}} [J_{\text{tr}} - J_{\text{rel}}] \quad \text{E91}$$

$$\frac{d[\text{Ca}^{2+}]_{\text{NSR}}}{dt} = J_{\text{up}} \frac{V_{\text{myo}}}{V_{\text{NSR}}} - J_{\text{tr}} \frac{V_{\text{JSR}}}{V_{\text{NSR}}} \quad \text{E92}$$

$$\frac{d[\text{Ca}^{2+}]_{\text{m}}}{dt} = \delta (V_{\text{uni}} - V_{\text{NaCa}}) \quad \text{E93}$$

$$\frac{d[\text{Na}^+]_i}{dt} = - \left( I_{\text{Na}} + I_{\text{Na,b}} + I_{\text{ns,Na}} + 3 I_{\text{NaCa}} + 3 I_{\text{NaK}} \right) \frac{A_{\text{cap}}}{V_{\text{myo}} F} \quad \text{E94}$$

$$\frac{d[\text{K}^+]_i}{dt} = - \left( I_{\text{K}} + I_{\text{K}_1} + I_{\text{Kp}} + I_{\text{ns,K}} + I_{\text{Ca,K}} - 2 I_{\text{NaK}} \right) \frac{A_{\text{cap}}}{V_{\text{myo}} F} \quad \text{E95}$$

### S1.4. Force generation model (1)

$$\frac{d[\text{P}_0]}{dt} = - \left( k_{\text{pn}}^{\text{trop}} + f_{01} \right) [\text{P}_0] + k_{\text{np}}^{\text{trop}} [\text{N}_0] + g_{01}(\text{SL}) [\text{P}_1] \quad \text{E96}$$

$$\frac{d[\text{P}_1]}{dt} = - \left( k_{\text{pn}}^{\text{trop}} + f_{12} + g_{01}(\text{SL}) \right) [\text{P}_1] + k_{\text{np}}^{\text{trop}} [\text{N}_1] + f_{01} [\text{P}_0] + g_{12}(\text{SL}) [\text{P}_2] \quad \text{E97}$$

$$\frac{d[\text{P}_2]}{dt} = - \left( f_{23} + g_{12}(\text{SL}) \right) [\text{P}_2] + f_{12} [\text{P}_1] + g_{23}(\text{SL}) [\text{P}_3] \quad \text{E98}$$

$$\frac{d[\text{P}_3]}{dt} = - g_{23}(\text{SL}) [\text{P}_3] + f_{23} [\text{P}_2] \quad \text{E99}$$

$$\frac{d[\text{N}_1]}{dt} = k_{\text{pn}}^{\text{trop}} [\text{P}_1] + \left( k_{\text{np}}^{\text{trop}} + g_{01}'(\text{SL}) \right) [\text{N}_1] \quad \text{E100}$$

|                                                                                                                                             |      |
|---------------------------------------------------------------------------------------------------------------------------------------------|------|
| $[N_0] = 1 - ([N_1] + [P_0] + [P_1] + [P_2] + [P_3])$                                                                                       | E101 |
| $f_{01} = 3 \times f_{XB}$                                                                                                                  | E102 |
| $f_{12} = 10 \times f_{XB}$                                                                                                                 | E103 |
| $f_{23} = 7 \times f_{XB}$                                                                                                                  | E104 |
| $g_{01} = 1 \times g_{XB}^{\min}$                                                                                                           | E105 |
| $g_{12} = 2 \times g_{XB}^{\min}$                                                                                                           | E106 |
| $g_{23} = 3 \times g_{XB}^{\min}$                                                                                                           | E107 |
| $g_{01}(SL) = 1 \times \phi \times g_{XB}^{\min}$                                                                                           | E108 |
| $g_{12}(SL) = 2 \times \phi \times g_{XB}^{\min}$                                                                                           | E109 |
| $g_{23}(SL) = 3 \times \phi \times g_{XB}^{\min}$                                                                                           | E110 |
| $\phi = 1 + \frac{2.3 - SL}{(2.3 - 1.7)^{1.6}}$                                                                                             | E111 |
| $k_{np}^{\text{trop}} = k_{pn}^{\text{trop}} \left[ \frac{[LTRPNCa]}{K_{1/2}^{\text{trop}} [LTRPN]_{\text{tot}}} \right]^{N^{\text{trop}}}$ | E112 |
| $K_{1/2}^{\text{trop}} = \left( 1 + \frac{K_{Ca}^{\text{trop}}}{1.7 \cdot 10^{-3} - 0.8 \cdot 10^{-3} \frac{(SL - 1.7)}{0.6}} \right)^{-1}$ | E113 |
| $N^{\text{trop}} = 3.5 \times SL - 2.0$                                                                                                     | E114 |
| $K_{Ca}^{\text{trop}} = \frac{k_{l\text{trpn}}^-}{k_{l\text{trpn}}^+}$                                                                      | E115 |
| $\sum \text{PATHS} = g_{01} g_{12} g_{23} + f_{01} g_{12} g_{23} + f_{01} f_{12} g_{23} + f_{01} f_{12} f_{23}$                             | E116 |
| $P1_{\text{max}} = \frac{f_{01} g_{12} g_{23}}{\sum \text{PATHS}}$                                                                          | E117 |
| $P2_{\text{max}} = \frac{f_{01} f_{12} g_{23}}{\sum \text{PATHS}}$                                                                          | E118 |
| $P3_{\text{max}} = \frac{f_{01} f_{12} f_{23}}{\sum \text{PATHS}}$                                                                          | E119 |
| $\text{Force} = \zeta \frac{P_1 + N_1 + 2 P_2 + 3 P_3}{P1_{\text{max}} + 2 P2_{\text{max}} + 3 P3_{\text{max}}}$                            | E120 |

$$\text{Force}_{\text{Norm}} = \frac{P_1 + N_1 + P_2 + P_3}{P1_{\text{max}} + P2_{\text{max}} + P3_{\text{max}}} \quad \text{E121}$$

$$V_{\text{AM}} = V_{\text{AM}}^{\text{max}} \left( \frac{f_{01} [P_0] + f_{12} [P_1] + f_{23} [P_2]}{f_{01} + f_{12} + f_{23}} \right) \times \left( 1 + \frac{K_{\text{M,AM}}^{\text{ATP}}}{[\text{ATP}]_i} \left[ 1 + \frac{[\text{ADP}]_i}{K_{i,\text{AM}}} \right] \right)^{-1} \quad \text{E122}$$

### S1.5. Mitochondrial membrane potential ( $\Delta\Psi_m$ )

$$\frac{d \Delta\Psi_m}{dt} = \frac{V_{\text{He}} + V_{\text{He(F)}} - V_{\text{Hu}} - V_{\text{ANT}} - V_{\text{HLeak}} - V_{\text{NaCa}} - 2 V_{\text{uni}} - V_{\text{IMAC}}}{C_{\text{mito}}} \quad \text{E123}$$

### S1.6. Energy metabolism system

#### *Mitochondrial metabolites balance equations*

$$\frac{d [\text{ATP}]_i}{dt} = V_{\text{ANT}} \frac{V_{\text{mito}}}{V_{\text{myo}}} - V_{\text{CK}}^{\text{mito}} - V_{\text{AM}} - \frac{1}{2} J_{\text{up}} - (I_{\text{pCa}} + I_{\text{NaK}}) \frac{A_{\text{cap}}}{V_{\text{myo}} F} \quad \text{E124}$$

$$\frac{d [\text{ATP}]_{\text{ic}}}{dt} = -V_{\text{CK}}^{\text{cyto}} - V_{\text{ATPase}}^{\text{cyto}} \quad \text{E125}$$

$$\frac{d [\text{CrP}]_i}{dt} = V_{\text{CK}}^{\text{mito}} - V_{\text{tr}}^{\text{CrP}} \quad \text{E126}$$

$$\frac{d [\text{CrP}]_{\text{ic}}}{dt} = V_{\text{tr}}^{\text{CrP}} + V_{\text{CK}}^{\text{cyto}} \quad \text{E127}$$

$$\frac{d [\text{ADP}]_m}{dt} = V_{\text{ANT}} - V_{\text{ATPase}} - V_{\text{SL}} \quad \text{E128}$$

$$[\text{ATP}]_m = C_A - [\text{ADP}]_m \quad \text{E129}$$

$$\frac{d [\text{NADH}]}{dt} = -V_{\text{O}_2} + V_{\text{IDH}} + V_{\text{KGDH}} + V_{\text{MDH}} \quad \text{E130}$$

$$\frac{d [\text{ISOC}]}{dt} = V_{\text{ACO}} - V_{\text{IDH}} \quad \text{E131}$$

$$\frac{d [\alpha\text{KG}]}{dt} = V_{\text{IDH}} - V_{\text{KGDH}} + V_{\text{AAT}} \quad \text{E132}$$

|                                                                                                                                                                                                 |      |
|-------------------------------------------------------------------------------------------------------------------------------------------------------------------------------------------------|------|
| $\frac{d[\text{SCoA}]}{dt} = V_{\text{KGDH}} - V_{\text{SL}}$                                                                                                                                   | E133 |
| $\frac{d[\text{Suc}]}{dt} = V_{\text{SL}} - V_{\text{SDH}}$                                                                                                                                     | E134 |
| $\frac{d[\text{FUM}]}{dt} = V_{\text{SDH}} - V_{\text{FH}}$                                                                                                                                     | E135 |
| $\frac{d[\text{MAL}]}{dt} = V_{\text{FH}} - V_{\text{MDH}}$                                                                                                                                     | E136 |
| $\frac{d[\text{OAA}]}{dt} = V_{\text{MDH}} - V_{\text{CS}} - V_{\text{AAT}}$                                                                                                                    | E137 |
| $[\text{CIT}] = C_{\text{Kint}} - \left( \begin{array}{c} [\text{ISOC}] + [\alpha\text{KG}] + [\text{SCoA}] + [\text{Suc}] \\ + [\text{FUM}] + [\text{MAL}] + [\text{OAA}] \end{array} \right)$ | E138 |

*Cytosolic metabolic reaction rates*

|                                                                                                                                                                                                                                                                                                                                                                                                                               |      |
|-------------------------------------------------------------------------------------------------------------------------------------------------------------------------------------------------------------------------------------------------------------------------------------------------------------------------------------------------------------------------------------------------------------------------------|------|
| $V_{\text{ANT}} = V_{\text{maxANT}} \frac{0.75 \left( 1 - \frac{0.25 [\text{ATP}]_i \times 0.45 [\text{ADP}]_m}{0.17 [\text{ADP}]_i \times 0.025 [\text{ATP}]_m} \right) \left( e^{\frac{F}{RT} \Delta\Psi_m} \right)}{\left( 1 + \frac{0.25 [\text{ATP}]_i}{0.225 [\text{ADP}]_i} e^{\left( \frac{-h^{\text{ANT}} F \Delta\Psi_m}{RT} \right)} \right) \left( 1 + \frac{0.45 [\text{ADP}]_m}{0.025 [\text{ATP}]_m} \right)}$ | E139 |
| $V_{\text{CK}}^{\text{cyto}} = k_{\text{CK}}^{\text{cyto}} \left( [\text{ATP}]_{\text{ic}} [\text{Cr}]_{\text{ic}} - \frac{[\text{ADP}]_{\text{ic}} [\text{CrP}]_{\text{ic}}}{K_{\text{EQ}}} \right)$                                                                                                                                                                                                                         | E140 |
| $V_{\text{CK}}^{\text{mito}} = k_{\text{CK}}^{\text{mito}} \left( [\text{ATP}]_i [\text{Cr}]_i - \frac{[\text{ADP}]_i [\text{CrP}]_i}{K_{\text{EQ}}} \right)$                                                                                                                                                                                                                                                                 | E141 |
| $V_{\text{tr}}^{\text{CrP}} = k_{\text{tr}}^{\text{Cr}} ([\text{CrP}]_i - [\text{CrP}]_{\text{ic}})$                                                                                                                                                                                                                                                                                                                          | E142 |

*Tricarboxylic acid cycle reaction rates*

|                                                                                                                                                                                                                                                                                                       |      |
|-------------------------------------------------------------------------------------------------------------------------------------------------------------------------------------------------------------------------------------------------------------------------------------------------------|------|
| $V_{\text{CS}} = k_{\text{cat}}^{\text{CS}} E_{\text{T}}^{\text{CS}} \left( 1 + \frac{K_{\text{M}}^{\text{AcCoA}}}{[\text{AcCoA}]} + \frac{K_{\text{M}}^{\text{OAA}}}{[\text{OAA}]} + \frac{K_{\text{M}}^{\text{AcCoA}}}{[\text{AcCoA}]} \frac{K_{\text{M}}^{\text{OAA}}}{[\text{OAA}]} \right)^{-1}$ | E143 |
| $V_{\text{ACO}} = k_{\text{f}}^{\text{ACO}} \left( [\text{CIT}] - \frac{[\text{ISOC}]}{K_{\text{E}}^{\text{ACO}}} \right)$                                                                                                                                                                            | E144 |

|                                                                                                                                                                                                                                                                                                                                                                                                                                                                                                                                                             |      |
|-------------------------------------------------------------------------------------------------------------------------------------------------------------------------------------------------------------------------------------------------------------------------------------------------------------------------------------------------------------------------------------------------------------------------------------------------------------------------------------------------------------------------------------------------------------|------|
| $f_a^{\text{IDH}} = \left[ \left( 1 + \frac{[\text{ADP}]_m}{K_{\text{ADP}}^a} \right) \left( 1 + \frac{[\text{Ca}^{2+}]_m}{K_{\text{Ca}}^a} \right) \right]^{-1}$                                                                                                                                                                                                                                                                                                                                                                                           | E145 |
| $f_i^{\text{IDH}} = \left( 1 + \frac{[\text{NADH}]}{K_{i,\text{NADH}}} \right)$                                                                                                                                                                                                                                                                                                                                                                                                                                                                             | E146 |
| $V_{\text{IDH}} = k_{\text{cat}}^{\text{IDH}} E_{\text{T}}^{\text{IDH}} \left[ \left( 1 + \frac{[\text{H}^+]}{k_{h,1}} + \frac{k_{h,2}}{[\text{H}^+]} \right) + f_i^{\text{IDH}} \left( \frac{K_{\text{M}}^{\text{NAD}}}{[\text{NAD}]} \right) \right. \\ \left. + f_a^{\text{IDH}} \left( \frac{K_{\text{M}}^{\text{ISOC}}}{[\text{ISOC}]} \right)^{\text{ni}} + f_a^{\text{IDH}} f_i^{\text{IDH}} \left( \frac{K_{\text{M}}^{\text{ISOC}}}{[\text{ISOC}]} \right)^{\text{ni}} \left( \frac{K_{\text{M}}^{\text{NAD}}}{[\text{NAD}]} \right) \right]^{-1}$ | E147 |
| $f_a^{\text{KGDH}} = \left[ \left( 1 + \frac{[\text{Mg}^{2+}]}{K_{\text{D}}^{\text{Mg}^{2+}}} \right) \left( 1 + \frac{[\text{Ca}^{2+}]_m}{K_{\text{D}}^{\text{Ca}^{2+}}} \right) \right]^{-1}$                                                                                                                                                                                                                                                                                                                                                             | E148 |
| $V_{\text{KGDH}} = \frac{k_{\text{cat}}^{\text{KGDH}} E_{\text{T}}^{\text{KGDH}}}{1 + f_a^{\text{KGDH}} \frac{K_{\text{M}}^{\alpha\text{KG}}}{[\alpha\text{KG}]} + f_a^{\text{KGDH}} \left( \frac{K_{\text{M}}^{\text{NAD}}}{[\text{NAD}]} \right)^{n_{\alpha\text{KG}}}}$                                                                                                                                                                                                                                                                                  | E149 |
| $V_{\text{SL}} = k_{\text{f}}^{\text{SL}} \left( [\text{SCoA}][\text{ADP}]_m - \frac{[\text{Suc}][\text{ATP}]_m[\text{CoA}]}{K_{\text{E}}^{\text{SL}}} \right)$                                                                                                                                                                                                                                                                                                                                                                                             | E150 |
| $V_{\text{SDH}} = \frac{k_{\text{cat}}^{\text{SDH}} E_{\text{T}}^{\text{SDH}}}{1 + \left( \frac{K_{\text{M}}^{\text{Suc}}}{[\text{Suc}]} \right) \left( 1 + \frac{[\text{OAA}]}{K_{i,\text{sdh}}^{\text{OAA}}} \right) \left( 1 + \frac{[\text{FUM}]}{K_i^{\text{FUM}}} \right)}$                                                                                                                                                                                                                                                                           | E151 |
| $V_{\text{FH}} = k_{\text{f}}^{\text{FH}} \left( [\text{FUM}] - \frac{[\text{MAL}]}{K_{\text{E}}^{\text{FH}}} \right)$                                                                                                                                                                                                                                                                                                                                                                                                                                      | E152 |
| $f_{h,a} = \left( 1 + \frac{[\text{H}^+]}{k_{h1}} + \frac{[\text{H}^+]^2}{k_{h1} k_{h2}} \right)^{-1} + k_{\text{offset}}$                                                                                                                                                                                                                                                                                                                                                                                                                                  | E153 |
| $f_{h,i} = \left( 1 + \frac{k_{h3}}{[\text{H}^+]} + \frac{k_{h3} k_{h4}}{[\text{H}^+]^2} \right)^{-2}$                                                                                                                                                                                                                                                                                                                                                                                                                                                      | E154 |
| $V_{\text{MDH}} = \frac{k_{\text{cat}}^{\text{MDH}} E_{\text{T}}^{\text{MDH}} f_{h,a} f_{h,i}}{1 + \frac{K_{\text{M}}^{\text{MAL}}}{[\text{MAL}]} \left( 1 + \frac{[\text{OAA}]}{K_i^{\text{OAA}}} \right) + \frac{K_{\text{M}}^{\text{NAD}}}{[\text{NAD}]} + \frac{K_{\text{M}}^{\text{MAL}}}{[\text{MAL}]} \left( 1 + \frac{[\text{OAA}]}{K_i^{\text{OAA}}} \right) \frac{K_{\text{M}}^{\text{NAD}}}{[\text{NAD}]}}$                                                                                                                                      | E155 |

$$V_{AAT} = k_f^{AAT} [OAA][GLU] \frac{k_{ASP} K_E^{AAT}}{(k_{ASP} K_E^{AAT} + [\alpha KG] k_f^{AAT})} \quad E156$$

*Oxidative phosphorylation reaction rates*

$$V_{O_2} = 0.5 \rho^{res} \frac{\left( r_a + r_{c1} e^{\left( \frac{6F \Delta \Psi_B}{RT} \right)} e^{\left( \frac{A_{res} F}{RT} \right)} - r_a e^{\left( \frac{g 6F \Delta \mu_H}{RT} \right)} + r_{c2} e^{\left( \frac{A_{res} F}{RT} \right)} e^{\left( \frac{g 6F \Delta \mu_H}{RT} \right)} \right)}{\left( 1 + r_1 e^{\left( \frac{F A_{res}}{RT} \right)} e^{\left( \frac{6F \Delta \Psi_B}{RT} \right)} + \left( r_2 + r_3 e^{\left( \frac{F A_{res}}{RT} \right)} \right) e^{\left( \frac{g 6F \Delta \mu_H}{RT} \right)} \right)} \quad E157$$

$$V_{He} = 6 \rho^{res} \frac{\left( r_a e^{\left( \frac{A_{res} F}{RT} \right)} - (r_a + r_b) e^{\left( \frac{g 6F \Delta \mu_H}{RT} \right)} \right)}{\left( 1 + r_1 e^{\left( \frac{F A_{res}}{RT} \right)} e^{\left( \frac{6F \Delta \Psi_B}{RT} \right)} + \left( r_2 + r_3 e^{\left( \frac{F A_{res}}{RT} \right)} \right) e^{\left( \frac{g 6F \Delta \mu_H}{RT} \right)} \right)} \quad E158$$

$$A_{res} = \frac{RT}{F} \ln \left( K_{res} \sqrt{\frac{[NADH]}{[NAD^+]}} \right) \quad E159$$

$$[NAD^+] = C_{PN} - [NADH] \quad E160$$

$$V_{He(F)} = 4 \rho^{res(F)} \frac{\left( r_a e^{\left( \frac{A_{res(F)} F}{RT} \right)} - (r_a + r_b) e^{\left( \frac{g 6F \Delta \mu_H}{RT} \right)} \right)}{\left( 1 + r_1 e^{\left( \frac{F A_{res(F)}}{RT} \right)} e^{\left( \frac{6F \Delta \Psi_B}{RT} \right)} + \left( r_2 + r_3 e^{\left( \frac{F A_{res(F)}}{RT} \right)} \right) e^{\left( \frac{g 6F \Delta \mu_H}{RT} \right)} \right)} \quad E161$$

$$A_{res(F)} = \frac{RT}{F} \ln \left( K_{res(F)} \sqrt{\frac{[FADH_2]}{[FAD]}} \right) \quad E162$$

$$V_{ATPase} = -\rho^{F1} \frac{\left( 10^2 p_a + p_{c1} e^{\left( \frac{3F \Delta \Psi_B}{RT} \right)} e^{\left( \frac{A_{F1} F}{RT} \right)} - \left( p_a e^{\left( \frac{3F \Delta \mu_H}{RT} \right)} + p_{c2} e^{\left( \frac{A_{F1} F}{RT} \right)} e^{\left( \frac{3F \Delta \mu_H}{RT} \right)} \right) \right)}{\left( 1 + p_1 e^{\left( \frac{F A_{F1}}{RT} \right)} e^{\left( \frac{3F \Delta \Psi_B}{RT} \right)} + \left( p_2 + p_3 e^{\left( \frac{F A_{F1}}{RT} \right)} \right) e^{\left( \frac{3F \Delta \mu_H}{RT} \right)} \right)} \quad E163$$

---


$$V_{\text{Hu}} = -3\rho^{F1} \frac{10^2 p_a \left(1 + e^{\left(\frac{F A_{F1}}{R T}\right)}\right) - (p_a + p_b) e^{\left(\frac{3 F \Delta\mu_H}{R T}\right)}}{\left(1 + p_1 e^{\left(\frac{F A_{F1}}{R T}\right)}\right) e^{\left(\frac{3 F \Delta\Psi_B}{R T}\right)} + \left(p_2 + p_3 e^{\left(\frac{F A_{F1}}{R T}\right)}\right) e^{\left(\frac{3 F \Delta\mu_H}{R T}\right)}}$$
E164


---

$$A_{F1} = \frac{R T}{F} \ln \left( K_{F1} \frac{[\text{ATP}]_m}{[\text{ADP}]_m \text{Pi}} \right)$$
E165


---

$$V_{\text{Hleak}} = g_H \Delta\mu_H$$
E166


---

$$\Delta\mu_H = -2.303 \frac{R T}{F} \Delta\text{pH} + \Delta\Psi_m$$
E167


---

*Mitochondrial Ca<sup>2+</sup> handling rates*

---

$$V_{\text{uni}} = V_{\text{max}}^{\text{uni}} \frac{\frac{[\text{Ca}^{2+}]_i}{K_{\text{trans}}} \left(1 + \frac{[\text{Ca}^{2+}]_i}{K_{\text{trans}}}\right)^3 \frac{2 F (\Delta\Psi_m - \Delta\Psi^0)}{R T}}{\left( \left(1 + \frac{[\text{Ca}^{2+}]_i}{K_{\text{trans}}}\right)^4 + \frac{L}{\left(1 + \frac{[\text{Ca}^{2+}]_i}{K_{\text{act}}}\right)^{n_a}} \right) \left(1 - e^{\left\{\frac{-2 F (\Delta\Psi_m - \Delta\Psi^0)}{R T}\right\}}\right)}$$
E168


---

$$V_{\text{NaCa}} = V_{\text{max}}^{\text{NaCa}} \frac{e^{\left(\frac{b F (\Delta\Psi_m - \Delta\Psi^0)}{R T}\right)} \left(\ln \frac{[\text{Ca}^{2+}]_m}{[\text{Ca}^{2+}]_i}\right)}{\left(1 + \frac{K_{\text{Na}}}{[\text{Na}^+]_i}\right)^n \left(1 + \frac{K_{\text{Ca}}}{[\text{Ca}^{2+}]_m}\right)}$$
E169


---

$$\frac{d[\text{Ca}^{2+}]_m}{dt} = \delta(V_{\text{uni}} - V_{\text{NaCa}})$$
E170


---

*ROS-induced-ROS-release rates*

$$V_{SOD} = \frac{2 k_{SOD}^1 k_{SOD}^5 \left( k_{SOD}^1 + k_{SOD}^3 \left( 1 + \frac{[H_2O_2]}{K_i^{H2O2}} \right) \right) E_{SOD}^T [O_2^{\cdot-}]}{k_{SOD}^5 \left( 2 k_{SOD}^1 + k_{SOD}^3 \left( 1 + \frac{[H_2O_2]}{K_i^{H2O2}} \right) \right) + [O_2^{\cdot-}] k_{SOD}^1 k_{SOD}^3 \left( 1 + \frac{[H_2O_2]}{K_i^{H2O2}} \right)} \quad E171$$

$$V_{CAT} = 2 k_{CAT}^1 E_{CAT}^T [H_2O_2] e^{-fr [H_2O_2]} \quad E172$$

$$V_{GPX} = \frac{E_{GPX}^T [H_2O_2][GSH]}{\Phi_1 [GSH] + \Phi_2 [H_2O_2]} \quad E173$$

$$V_{GR} = \frac{k_{GR}^1 E_{GR}^T}{1 + \frac{K_M^{GSSG}}{[GSSG]} + \frac{K_M^{NADPH}}{[NADPH]} + \frac{K_M^{GSSG}}{[GSSG]} \frac{K_M^{NADPH}}{[NADPH]}} \quad E174$$

$$V_{ROS}^{Tr} = j \cdot \frac{V_{IMAC}}{\Delta\Psi_m} \left( \Delta\Psi_m - \frac{RT}{F} \log \left( \frac{[O_2^{\cdot-}]_m}{[O_2^{\cdot-}]_i} \right) \right) \quad E175$$

$$V_{IMAC} = \left( a + \frac{b}{1 + \frac{K_{cc}}{[O_2^{\cdot-}]_i}} \right) \left( G_L + \frac{G_{max}}{1 + e^{\left( \kappa (\Delta\Psi_m^b - \Delta\Psi_m) \right)}} \right) \Delta\Psi_m \quad E176$$

$$G_T = [GSH] + 2 \times [GSSG] \quad E177$$

*ROS-induced-ROS-release metabolites balance equations*

$$\frac{d[O_2^{\cdot-}]_m}{dt} = \text{shunt} \cdot V_{O_2} - V_{ROS}^{Tr} \quad E178$$

$$\frac{d[O_2^{\cdot-}]_i}{dt} = V_{ROS}^{Tr} - V_{SOD} \quad E179$$

$$\frac{d[H_2O_2]}{dt} = V_{SOD} - V_{CAT} - V_{GPX} \quad E180$$

$$\frac{d[GSH]}{dt} = V_{GR} - V_{GPX} \quad E181$$



## S2. Model parameters

### S2.1. General parameters

| Symbol        | Value                  | Units                               | Description                                  | Eq. | Ref. |
|---------------|------------------------|-------------------------------------|----------------------------------------------|-----|------|
| $F$           | 96.5                   | C mmol <sup>-1</sup>                | Faraday constant                             |     |      |
| $T$           | 310                    | K                                   | Absolute temperature                         |     |      |
| $R$           | 8.314                  | J mol <sup>-1</sup> K <sup>-1</sup> | Universal gas constant                       |     |      |
| $C_m$         | 1.0                    | μF cm <sup>-2</sup>                 | Membrane capacitance                         | E79 | 2    |
| $A_{cap}$     | 1.534 10 <sup>-4</sup> | cm <sup>2</sup>                     | Capacitative cell surface area               | E88 | 2    |
| $V_{myo}$     | 25.84                  | pL                                  | Cytosolic volume                             | E88 | 2    |
| $V_{mito}$    | 15.89                  | pL                                  | Mitochondrial volume                         | E92 | 11   |
| $V_{NSR}$     | 1.4                    | pL                                  | NSR volume                                   | E91 | 3    |
| $V_{JSR}$     | 0.16                   | pL                                  | JSR volume                                   | E89 | 3    |
| $V_{SS}$      | 0.495 10 <sup>-3</sup> | pL                                  | SS volume                                    | E89 | 3    |
| $[K^+]_o$     | 5.4                    | mM                                  | Extracellular K <sup>+</sup> concentration   | E17 | 2    |
| $[Na^+]_o$    | 140.0                  | mM                                  | Extracellular Na <sup>+</sup> concentration  | E2  | 2    |
| $[Ca^{2+}]_o$ | 2.0                    | mM                                  | Extracellular Ca <sup>2+</sup> concentration | E32 | 2    |

### S2.2. Sarcolemmal membrane current parameters

| Symbol         | Value                   | Units               | Description                                                                         | Eq. | Ref. |
|----------------|-------------------------|---------------------|-------------------------------------------------------------------------------------|-----|------|
| $\bar{G}_{Na}$ | 12.8                    | mS μF <sup>-1</sup> | Maximal Na channel conductance                                                      | E1  | 2    |
| $\bar{G}_{Kp}$ | 8.28 × 10 <sup>-3</sup> | mS μF <sup>-1</sup> | Maximal plateau K channel conductance                                               | E29 | 2    |
| $P_{Na,K}$     | 0.01833                 |                     | Na+ permeability of K+ channel                                                      | E17 | 2    |
| $k_{NaCa}$     | 9000                    | μA μF <sup>-1</sup> | Scaling factor of Na <sup>+</sup> /Ca <sup>+</sup> exchange                         | E32 | 3    |
| $k_{m,Na}$     | 87.5                    | mM                  | Na half saturation constant NCX                                                     | E32 | 2    |
| $k_{m,Ca}$     | 1.38                    | mM                  | Na half saturation constant NCX                                                     | E32 | 2    |
| $k_{sat}$      | 0.1                     |                     | Na <sup>+</sup> /Ca <sup>2+</sup> exchange saturation factor at negative potentials | E32 | 2    |
| $\eta$         | 0.35                    |                     | Controls voltage dependence of NCX                                                  | E32 | 2    |

### S2.3. Na<sup>+</sup>/K<sup>+</sup> pump parameters

| Symbol            | Value                | Units              | Description                                                           | Eq. | Ref.  |
|-------------------|----------------------|--------------------|-----------------------------------------------------------------------|-----|-------|
| $\bar{I}_{NaK}$   | 3.147                | $\mu A \mu F^{-1}$ | Maximum Na <sup>+</sup> /K <sup>+</sup> pump current                  | E33 | 12,13 |
| $K_{m,Na}$        | 10                   | mM                 | Na half saturation for Na <sup>+</sup> /K <sup>+</sup> pump           | E33 | 2     |
| $K_{m,K}$         | 1.5                  | mM                 | K half saturation for Na <sup>+</sup> /K <sup>+</sup> pump            | E33 | 2     |
| $K_{NaK}^{1,ATP}$ | $8.0 \times 10^{-3}$ | mM                 | ATP half saturation constant for Na <sup>+</sup> /K <sup>+</sup> pump | E35 | 5     |
| $K_{NaK}^{i,ADP}$ | 0.1                  | mM                 | ADP inhibition constant for Na <sup>+</sup> /K <sup>+</sup> pump      | E35 | 5     |

### S2.4. Non-specific channel current parameters

| Symbol         | Value                 | Units       | Description                                                        | Eq. | Ref. |
|----------------|-----------------------|-------------|--------------------------------------------------------------------|-----|------|
| $P_{ns(Na)}$   | $1.75 \times 10^{-7}$ | $cm s^{-1}$ | Non specific channel current Na permeability                       | E38 | 7    |
| $K_{m,ns(Ca)}$ | $1.2 \times 10^{-3}$  | mM          | Ca <sup>2+</sup> half saturation constant for non specific current | E37 | 2    |
| $P_{ns(K)}$    | 0                     | $cm s^{-1}$ | Non specific channel current K permeability                        | E40 | 3    |

e. Luo and Rudy (2)

### S2.5. Background Ca<sup>2+</sup> current parameters

| Symbol           | Value                  | Units           | Description                                             | Eq. | Ref. |
|------------------|------------------------|-----------------|---------------------------------------------------------|-----|------|
| $\bar{G}_{Ca,b}$ | $3.217 \times 10^{-3}$ | $mS \mu F^{-1}$ | Maximum background current Ca <sup>2+</sup> conductance | E41 | *    |
| $\bar{G}_{Na,b}$ | $5.45 \times 10^{-4}$  | $mS \mu F^{-1}$ | Maximum background current Na <sup>+</sup> conductance  | E43 | *    |

Note: \*. Adjusted from (2, 3) based on physiological levels of Ca<sup>2+</sup> and Na<sup>+</sup> in cardiomyocytes (3, 4).

### S2.6. Sarcolemmal Ca<sup>2+</sup> current parameters

| Symbol              | Value              | Units              | Description                                                                     | Eq. | Ref. |
|---------------------|--------------------|--------------------|---------------------------------------------------------------------------------|-----|------|
| $I_{pCa\_max}$      | 0.575              | $\mu A \mu F^{-1}$ | Maximum sarcolemmal Ca <sup>2+</sup> pump current                               | E45 | 3    |
| $K_m^{pCa}$         | $5 \times 10^{-4}$ | mM                 | Ca <sup>2+</sup> half saturation constant for sarcolemmal Ca <sup>2+</sup> pump | E45 | 2    |
| $K_{ml\_pCa}^{ATP}$ | 0.012              | mM                 | First ATP half saturation constant for sarcolemmal Ca <sup>2+</sup> pump        | E46 | 14   |

|                     |      |    |                                                                    |     |    |
|---------------------|------|----|--------------------------------------------------------------------|-----|----|
| $K_{m2\_pCa}^{ATP}$ | 0.23 | mM | Second ATP half saturation constant for sarcolemmal $Ca^{2+}$ pump | E46 | 14 |
| $K_{i\_pCa}^{ADP}$  | 1.0  | mM | ADP inhibition constant for sarcolemmal $Ca^{2+}$ pump             | E46 | 8  |

### S2.7. Sarcoplasmic reticulum $Ca^{2+}$ ATPase parameters

| Symbol           | Value                  | Units     | Description                                         | Eq. | Ref. |
|------------------|------------------------|-----------|-----------------------------------------------------|-----|------|
| $V_{max,f}$      | $2.989 \times 10^{-4}$ | $ms^{-1}$ | SERCA forward rate parameter                        | E47 | 2    |
| $V_{max,r}$      | $3.179 \times 10^{-4}$ | $ms^{-1}$ | SERCA reverse rate parameter                        | E47 | 2    |
| $K_{fb}$         | $2.4 \times 10^{-4}$   | mM        | Forward $Ca^{2+}$ half saturation constant of SERCA | E48 | 3    |
| $K_{rb}$         | 1.64269                | mM        | Reverse $Ca^{2+}$ half saturation constant of SERCA | E49 | 3    |
| $N_{fb}$         | 1.4                    |           | Forward cooperativity constant of SERCA             | E48 | 3    |
| $N_{rb}$         | 1.0                    |           | Reverse cooperativity constant of SERCA             | E49 | 3    |
| $K_{m,up}^{ATP}$ | 0.01                   | mM        | ATP half saturation constant for SERCA              | E50 | 5    |
| $K_{i,up}$       | 0.14                   | mM        | ADP first inhibition constant for SERCA             | E50 | 5    |
| $K'_{i,up}$      | 5.1                    | mM        | ADP second inhibition constant for SERCA            | E50 | 5    |

### S2.8. L-type $Ca^{2+}$ current parameters

| Symbol          | Value                  | Units              | Description                                        | Eq. | Ref. |
|-----------------|------------------------|--------------------|----------------------------------------------------|-----|------|
| a               | 2.0                    |                    | Mode transition parameter                          | E53 | 2    |
| b               | 2.0                    |                    | Mode transition parameter                          | E54 | 2    |
| $\omega$        | 0.01                   | $ms^{-1}$          | Mode transition parameter                          | E56 | 2    |
| f               | 0.3                    | $ms^{-1}$          | Transition rate into open state                    | E61 | 2    |
| g               | 2.0                    | $ms^{-1}$          | Transition rate out of open state                  | E61 | 2    |
| f'              | 0.0                    | $ms^{-1}$          | Transition rate into open state, mode Ca           | E67 | 2    |
| g'              | 0.0                    | $ms^{-1}$          | Transition rate out open state, mode Ca            | E67 | 2    |
| $\bar{P}_{Ca}$  | $1.24 \times 10^{-3}$  | $cm s^{-1}$        | L-type $Ca^{2+}$ channel permeability to $Ca^{2+}$ | E68 | 3    |
| $\bar{P}_K$     | $1.11 \times 10^{-11}$ | $cm s^{-1}$        | L-type $Ca^{2+}$ channel permeability to $K^+$     | E71 | 3    |
| $I_{Ca_{half}}$ | -0.4583                | $\mu A \mu F^{-1}$ | ICa level that reduces $\bar{P}_K$ by half         | E71 | 3    |

### S2.9. Ca<sup>2+</sup> release channel current parameters

| Symbol  | Value                  | Units                             | Description               | Eq. | Ref. |
|---------|------------------------|-----------------------------------|---------------------------|-----|------|
| $v_1$   | 3.6                    | ms <sup>-1</sup>                  | RyR flux channel constant | E79 | 3    |
| $n$     | 4                      |                                   | Cooperativity parameter   | E75 | 2    |
| $m$     | 3                      |                                   | Cooperativity parameter   | E76 | 2    |
| $k_a^+$ | $1.215 \times 10^{10}$ | mM <sup>-4</sup> ms <sup>-1</sup> | RyR rate constant         | E75 | 2    |
| $k_a^-$ | 0.576                  | ms <sup>-1</sup>                  | RyR rate constant         | E75 | 15   |
| $k_b^+$ | $4.05 \times 10^6$     | mM <sup>-3</sup> ms <sup>-1</sup> | RyR rate constant         | E76 | 2    |
| $k_b^-$ | 1.93                   | ms <sup>-1</sup>                  | RyR rate constant         | E76 | 2    |
| $k_c^+$ | 0.1                    | ms <sup>-1</sup>                  | RyR rate constant         | E76 | 15   |
| $k_c^-$ | $8.0 \times 10^{-4}$   | ms <sup>-1</sup>                  | RyR rate constant         | E76 | 2    |

### S2.10. Ca<sup>2+</sup> transport and buffering parameters

| Symbol          | Value                 | Units                             | Description                                                 | Eq. | Ref. |
|-----------------|-----------------------|-----------------------------------|-------------------------------------------------------------|-----|------|
| $\tau_{tr}$     | 0.5747                | ms                                | Time constant for transfer from subspace to myoplasm        | E82 | 16   |
| $\tau_{xfer}$   | 9.09                  | ms                                | Time constant for transfer from NSR to JSR                  | E83 | 3    |
| $K_m^{CMDN}$    | $2.38 \times 10^{-3}$ | mM                                | Ca <sup>2+</sup> half saturation constant for calmodulin    | E84 | 3    |
| $K_m^{CSQN}$    | 0.8                   | mM                                | Ca <sup>2+</sup> half saturation constant for calsequestrin | E85 | 3    |
| $k_{htrpn}^+$   | 100                   | mM <sup>-1</sup> ms <sup>-1</sup> | Ca <sup>2+</sup> on-rate for troponin high affinity sites   | E86 | 3    |
| $k_{htrpn}^-$   | $3.3 \cdot 10^{-4}$   | ms <sup>-1</sup>                  | Ca <sup>2+</sup> off-rate for troponin high affinity sites  | E87 | 3    |
| $k_{ltrpn}^+$   | 100                   | mM <sup>-1</sup> ms <sup>-1</sup> | Ca <sup>2+</sup> on-rate for troponin low affinity sites    | E88 | 3    |
| $k_{ltrpn}^-$   | $4 \cdot 10^{-2}$     | ms <sup>-1</sup>                  | Ca <sup>2+</sup> off-rate for troponin low affinity sites   | E88 | 2    |
| $[HTRPN]_{tot}$ | 0.14                  | mM                                | Total troponin high-affinity sites                          | E87 | 2    |
| $[LTRPN]_{tot}$ | 0.07                  | mM                                | Total troponin low-affinity sites                           | E88 | 2    |
| $[CMDN]_{tot}$  | $5.0 \times 10^{-2}$  | mM                                | Total myoplasmic calmodulin concentration                   | E84 | 2    |
| $[CSQN]_{tot}$  | 15                    | mM                                | Total NSR calsequestrin concentration                       | E85 | 3    |

### S2.11. Force generation parameters

| Symbol           | Value                | Units         | Description                                                   | Eq.  | Ref. |
|------------------|----------------------|---------------|---------------------------------------------------------------|------|------|
| $k_{pn}^{trop}$  | 0.04                 | $ms^{-1}$     | Transition rate from tropomyosin permissive to non-permissive | E96  | 3    |
| SL               | 2.15                 | $\mu m$       | Sarcomere length                                              | E111 | 3    |
| $f_{XB}$         | 0.05                 | $ms^{-1}$     | Transition rate from weak to strong cross bridge              | E102 | 16   |
| $g_{XB}^{min}$   | 0.1                  | $ms^{-1}$     | Minimum transition rate from strong to weak cross bridge      | E105 | 16   |
| $\zeta$          | 0.1                  | $N\ mm^{-2}$  | Conversion factor normalizing to physiological force          | E120 | 3    |
| $V_{AM}^{max}$   | $7.2 \times 10^{-3}$ | $mM\ ms^{-1}$ | Maximal rate of ATP hydrolysis by myofibrils (AM ATPase)      | E122 | 6    |
| $K_{M,AM}^{ATP}$ | 0.03                 | mM            | ATP half saturation constant of AM ATPase                     | E122 | 6    |
| $K_{i,AM}$       | 0.26                 | mM            | ADP inhibition constant of AM ATPase                          | E122 | 6    |

### S2.12. Cytoplasmic energy handling parameters

| Symbol              | Value                 | Units         | Description                                                     | Eq.  | Ref.   |
|---------------------|-----------------------|---------------|-----------------------------------------------------------------|------|--------|
| $C_T$               | 25                    | mM            | Total concentration of creatine metabolites (both compartments) |      | 17, 18 |
| $k_{CK}^{cyto}$     | $1.4 \times 10^{-4}$  | $ms^{-1}$     | Forward rate constant of cytoplasmic CK                         | E140 | 21     |
| $k_{CK}^{mito}$     | $1.33 \times 10^{-6}$ | $ms^{-1}$     | Forward rate constant of mitochondrial CK                       | E141 | 21     |
| $k_{tr}^{Cr}$       | $2.0 \times 10^{-3}$  | $ms^{-1}$     | Transfer rate constant of CrP                                   | E142 | 21     |
| $K_{EQ}$            | 0.0095                |               | Equilibrium constant of CK                                      | E140 | 17, 16 |
| $V_{ATPase}^{cyto}$ | $1.0 \cdot 10^{-5}$   | $mM\ ms^{-1}$ | Constitutive cytosolic ATP consumption rate                     | E125 | 19     |

### S2.13. Tricarboxylic acid cycle parameters

| Symbol         | Value                 | Units     | Description                  | Eq.  | Ref. |
|----------------|-----------------------|-----------|------------------------------|------|------|
| [AcCoA]        | 1.0                   | mM        | Acetyl CoA concentration     | E143 | 4    |
| $k_{cat}^{CS}$ | 0.05                  | $ms^{-1}$ | Catalytic constant of CS     | E143 | **   |
| $E_T^{CS}$     | 0.4                   | mM        | Concentration of CS          | E143 | 4    |
| $K_M^{AcCoA}$  | $1.26 \times 10^{-2}$ | mM        | Michaelis constant for AcCoA | E143 | 4    |

|                   |                       |                   |                                               |      |    |
|-------------------|-----------------------|-------------------|-----------------------------------------------|------|----|
| $K_M^{OAA}$       | $6.4 \times 10^{-4}$  | mM                | Michaelis constant for OAA                    | E143 | 4  |
| $C_{Kint}$        | 1.0                   | mM                | Sum of TCA cycle intermediates' concentration | E138 | 4  |
| $k_f^{ACO}$       | $1.25 \times 10^{-2}$ | $ms^{-1}$         | Forward rate constant of ACO                  | E144 | 4  |
| $K_E^{ACO}$       | 2.22                  |                   | Equilibrium constant of ACO                   | E144 | 4  |
| $K_{ADP}^a$       | 0.62                  | mM                | Activation constant by ADP                    | E145 | ** |
| $K_{Ca}^a$        | 0.0005                | mM                | Activation constant for $Ca^{2+}$             | E145 | *  |
| $K_{i,NADH}$      | 0.19                  | mM                | Inhibition constant by NADH                   | E146 | 4  |
| $k_{cat}^{IDH}$   | 0.03                  | $ms^{-1}$         | Rate constant of IDH                          | E147 | *  |
| $E_T^{IDH}$       | 0.109                 | mM                | Concentration of IDH                          | E147 | 4  |
| $[H^+]$           | $2.5 \times 10^{-5}$  | mM                | Matrix proton concentration                   | E147 | 4  |
| $k_{h,1}$         | $8.1 \times 10^{-5}$  | mM                | Ionization constant of IDH                    | E147 | 4  |
| $k_{h,2}$         | $5.98 \times 10^{-5}$ | mM                | Ionization constant of IDH                    | E147 | 4  |
| $K_M^{ISOC}$      | 1.52                  | mM                | Michaelis constant for isocitrate             | E147 | 4  |
| ni                | 2.0                   |                   | Cooperativity for isocitrate                  | E147 | 4  |
| $K_M^{NAD}$       | 0.923                 | mM                | Michaelis constant for $NAD^+$                | E147 | 4  |
| $K_D^{Mg^{2+}}$   | 0.0308                | mM                | Activation constant for $Mg^{2+}$             | E148 | 4  |
| $K_D^{Ca^{2+}}$   | $1.27 \times 10^{-3}$ | mM                | Activation constant for $Ca^{2+}$             | E148 | 4  |
| $E_T^{KGDH}$      | 0.5                   | mM                | Concentration of KGDH                         | E149 | 4  |
| $k_{cat}^{KGDH}$  | 0.05                  | $ms^{-1}$         | Rate constant of KGDH                         | E149 | ** |
| $K_M^{\alpha KG}$ | 1.94                  | mM                | Michaelis constant for $\alpha KG$            | E149 | 4  |
| $K_M^{NAD}$       | 38.7                  | mM                | Michaelis constant for NAD                    | E149 | 4  |
| $n_{\alpha KG}$   | 1.2                   |                   | Hill coefficient of KGDH for $\alpha KG$      | E149 | 4  |
| $Mg^{2+}$         | 0.4                   | mM                | $Mg^{2+}$ concentration in mitochondria       | E148 | 4  |
| $k_f^{SL}$        | $5.0 \times 10^{-4}$  | $mM^{-1} ms^{-1}$ | Forward rate constant of SL                   | E150 | ** |

|                   |                       |           |                                                        |      |    |
|-------------------|-----------------------|-----------|--------------------------------------------------------|------|----|
| $K_E^{SL}$        | 3.115                 |           | Equilibrium constant of the SL reaction                | E150 | 4  |
| [CoA]             | 0.02                  | mM        | Coenzyme A concentration                               | E150 | 4  |
| $k_{cat}^{SDH}$   | $3.0 \times 10^{-3}$  | $ms^{-1}$ | Rate constant of SDH                                   | E151 | ** |
| $E_T^{SDH}$       | 0.5                   | mM        | SDH enzyme concentration                               | E151 | 4  |
| $K_M^{Suc}$       | 0.03                  | mM        | Michaelis constant for succinate                       | E151 | 4  |
| $K_i^{FUM}$       | 1.3                   | mM        | Inhibition constant by fumarate                        | E151 | 4  |
| $K_{i,sdh}^{OAA}$ | 0.15                  | mM        | Inhibition constant by oxalacetate                     | E151 | 4  |
| $k_f^{FH}$        | $3.32 \times 10^{-3}$ | $ms^{-1}$ | Forward rate constant for FH                           | E152 | ** |
| $K_E^{FH}$        | 1.0                   |           | Equilibrium constant of FH                             | E152 | 4  |
| $k_{h1}$          | $1.13 \times 10^{-5}$ | mM        | Ionization constant of MDH                             | E153 | 4  |
| $k_{h2}$          | 26.7                  | mM        | Ionization constant of MDH                             | E153 | 4  |
| $k_{h3}$          | $6.68 \times 10^{-9}$ | mM        | Ionization constant of MDH                             | E154 | 4  |
| $k_{h4}$          | $5.62 \times 10^{-6}$ | mM        | Ionization constant of MDH                             | E154 | 4  |
| $k_{offset}$      | $3.99 \times 10^{-2}$ |           | pH-independent term in the pH activation factor of MDH | E153 | 4  |
| $k_{cat}^{MDH}$   | 0.111                 | $ms^{-1}$ | Rate constant of MDH                                   | E155 | ** |
| $E_T^{MDH}$       | 0.154                 | mM        | Total MDH enzyme concentration                         | E155 | 4  |
| $K_M^{MAL}$       | 1.493                 | mM        | Michaelis constant for malate                          | E155 | 4  |
| $K_i^{OAA}$       | $3.1 \times 10^{-3}$  | mM        | Inhibition constant for oxalacetate                    | E155 | 4  |
| $K_M^{NAD}$       | 0.2244                | mM        | Michaelis constant for $NAD^+$                         | E155 | 4  |
| [GLU]             | 10.0                  | mM        | Glutamate concentration                                | E156 | 4  |
| $k_f^{AAT}$       | $6.44 \times 10^{-4}$ | $ms^{-1}$ | Forward rate constant of AAT                           | E156 | 4  |
| $K_E^{AAT}$       | 6.6                   |           | Equilibrium constant of AAT                            | E156 | 4  |
| $k_{ASP}$         | $1.5 \times 10^{-6}$  | $ms^{-1}$ | Rate constant of aspartate consumption                 | E156 | ** |

Note: \*. The values of the Isocitrate dehydrogenase activation constants by ADP and  $Ca^{2+}$  have been modified to reproduce appropriately the kinetics reported by Rutter and Denton (5). \*\*. The kinetic constants of all the TCA cycle enzyme steps have been multiplied by a factor of 1.5-

4 with respect to those indicated in g to match the fluxes of the TCA cycle (22) in the integrated model that faces additional restrictions than those of the isolated mitochondrial model.

### S2.14. Oxidative Phosphorylation parameters

| Symbol                 | Value                   | Units            | Description                                                          | Eq.  | Ref. |
|------------------------|-------------------------|------------------|----------------------------------------------------------------------|------|------|
| $r_a$                  | $6.394 \times 10^{-13}$ | $\text{ms}^{-1}$ | Sum of products of rate constants                                    | E157 | 4    |
| $r_b$                  | $1.762 \times 10^{-16}$ | $\text{ms}^{-1}$ | Sum of products of rate constants                                    | E158 | 4    |
| $r_{c1}$               | $2.656 \times 10^{-22}$ | $\text{ms}^{-1}$ | Sum of products of rate constants                                    | E157 | 4    |
| $r_{c2}$               | $8.632 \times 10^{-30}$ | $\text{ms}^{-1}$ | Sum of products of rate constants                                    | E157 | 4    |
| $r_1$                  | $2.077 \times 10^{-18}$ |                  | Sum of products of rate constants                                    | E157 | 4    |
| $r_2$                  | $1.728 \times 10^{-9}$  |                  | Sum of products of rate constants                                    | E157 | 4    |
| $r_3$                  | $1.059 \times 10^{-26}$ |                  | Sum of products of rate constants                                    | E157 | 4    |
| $\rho^{\text{res}}$    | $3.0 \times 10^{-3}$    | mM               | Concentration of electron carriers (respiratory complexes I-III-IV)  | E157 | 4    |
| $K_{\text{res}}$       | $1.35 \times 10^{18}$   |                  | Equilibrium constant of respiration                                  | E159 | 4    |
| $\rho^{\text{res(F)}}$ | $3.75 \times 10^{-4}$   | mM               | Concentration of electron carriers (respiratory complexes II-III-IV) | E161 | *    |
| $\Delta\Psi_B$         | 50                      | mV               | Phase boundary potential                                             | E157 | 4    |
| $g$                    | 0.85                    |                  | Correction factor for voltage                                        | E157 | 4    |
| $K_{\text{res(F)}}$    | $5.765 \times 10^{13}$  |                  | Equilibrium constant of FADH <sub>2</sub> oxidation                  | E162 | 4    |
| [FADH2]                | 1.24                    | mM               | Concentration of FADH <sub>2</sub> (reduced)                         | E162 | 4    |
| [FAD]                  | 0.01                    | mM               | Concentration of FAD (oxidized)                                      | E162 | 4    |
| $p_a$                  | $1.656 \times 10^{-8}$  | $\text{ms}^{-1}$ | Sum of products of rate constants                                    | E163 | 4    |
| $p_b$                  | $3.373 \times 10^{-10}$ | $\text{ms}^{-1}$ | Sum of products of rate constants                                    | E164 | 4    |
| $p_{c1}$               | $9.651 \times 10^{-17}$ | $\text{ms}^{-1}$ | Sum of products of rate constants                                    | E163 | 4    |
| $p_{c2}$               | $4.585 \times 10^{-17}$ | $\text{ms}^{-1}$ | Sum of products of rate constants                                    | E163 | 4    |
| $p_1$                  | $1.346 \times 10^{-8}$  |                  | Sum of products of rate constants                                    | E163 | 4    |
| $p_2$                  | $7.739 \times 10^{-7}$  |                  | Sum of products of rate constants                                    | E163 | 4    |
| $p_3$                  | $6.65 \times 10^{-15}$  |                  | Sum of products of rate constants                                    | E163 | 4    |
| $\rho^{\text{F1}}$     | 1.5                     | mM               | Concentration of F <sub>1</sub> F <sub>0</sub> -ATPase               | E163 | 4    |
| $K_{\text{F1}}$        | $1.71 \times 10^6$      |                  | Equilibrium constant of ATP hydrolysis                               | E165 | 4    |
| Pi                     | 2.0                     | mM               | Inorganic phosphate concentration                                    | E165 | **   |



|                      |                        |                                         |                                         |      |    |
|----------------------|------------------------|-----------------------------------------|-----------------------------------------|------|----|
| $C_A$                | 1.5                    | mM                                      | Total sum of mito adenine nucleotides   | E129 | ** |
| $V_{\max\text{ANT}}$ | 0.025                  | mM ms <sup>-1</sup>                     | Maximal rate of the ANT                 | E139 | 4  |
| $h^{\text{ANT}}$     | 0.5                    |                                         | Fraction of $\Delta\Psi_m$              | E139 | 4  |
| $g_H$                | $1.0 \times 10^{-8}$   | mM ms <sup>-1</sup><br>mV <sup>-1</sup> | Ionic conductance of the inner membrane | E166 | 4  |
| $\Delta\text{pH}$    | -0.6                   | pH units                                | pH gradient across the inner memb.      | E167 | 4  |
| $C_{\text{PN}}$      | 10.0                   | mM                                      | Total sum of mito pyridine nucleotides  | E160 | 4  |
| $C_{\text{mito}}$    | $1.812 \times 10^{-3}$ | mM mV <sup>-1</sup>                     | Inner membrane capacitance              | E123 | 4  |

Note: \*. The respiratory complex II carriers concentration was adjusted with respect to the value in (6) to match the reported range of oxygen consumption rates (0.04 to 0.5 mM s<sup>-1</sup> = 5 - 60  $\mu\text{mol O}_2/\text{min}/\text{mg}$ ) (7). \*\*. The total nucleotide level and inorganic phosphate were corrected with respect to previous publication (6) to follow reported experimental evidence (7, 8)

### S2.15. Mitochondrial Ca<sup>2+</sup> handling parameters

| Symbol                   | Value                 | Units               | Description                                                               | Eq.  | Ref. |
|--------------------------|-----------------------|---------------------|---------------------------------------------------------------------------|------|------|
| $V_{\max}^{\text{uni}}$  | 0.0275                | mM ms <sup>-1</sup> | Vmax uniport Ca <sup>2+</sup> transport                                   | E168 | *    |
| $\Delta\Psi^\circ$       | 91                    | mV                  | Offset membrane potential                                                 | E168 | 4    |
| $K_{\text{act}}$         | $3.8 \times 10^{-4}$  | mM                  | Activation constant                                                       | E168 | 4    |
| $K_{\text{trans}}$       | 0.019                 | mM                  | $K_d$ for translocated Ca <sup>2+</sup>                                   | E168 | 4    |
| $L$                      | 110.0                 |                     | Keq for conformational transitions in uniporter                           | E168 | 4    |
| $n_a$                    | 2.8                   |                     | Uniporter activation cooperativity                                        | E168 | 4    |
| $V_{\max}^{\text{NaCa}}$ | $1.0 \times 10^{-4}$  | mM ms <sup>-1</sup> | Vmax of Na <sup>+</sup> /Ca <sup>2+</sup> antiporter                      | E169 | 4    |
| $b$                      | 0.5                   |                     | $\Delta\Psi_m$ dependence of Na <sup>+</sup> /Ca <sup>2+</sup> antiporter | E169 | 4    |
| $K_{\text{Na}}$          | 9.4                   | mM                  | Antiporter Na <sup>+</sup> constant                                       | E169 | 4    |
| $K_{\text{Ca}}$          | $3.75 \times 10^{-4}$ | mM                  | Antiporter Ca <sup>2+</sup> constant                                      | E169 | 4    |
| $n$                      | 3                     |                     | Na <sup>+</sup> /Ca <sup>2+</sup> antiporter cooperativity                | E169 | 4    |
| $\delta$                 | $3.0 \cdot 10^{-4}$   |                     | Fraction of free [Ca <sup>2+</sup> ] <sub>m</sub>                         | A93  | 4    |

Note: \*. The maximal rate of the Ca<sup>2+</sup> uniporter had to be adjusted to meet the transport fluxes experimentally determined (9, 10) in the new integrated model structure in which the Ca<sup>2+</sup> levels in the cytoplasm are no longer steady as they were in the isolated mitochondrial model (4).

*S2.16. States variables initial values*

| Symbol                             | Description                                          | Value                    |
|------------------------------------|------------------------------------------------------|--------------------------|
| V                                  | Sarcolemmal membrane potential                       | -87.28                   |
| m <sub>Na</sub>                    | Sodium channel activation gate                       | 0.03272                  |
| n <sub>Na</sub>                    | Sodium channel inactivation gate                     | 0.9909                   |
| j <sub>Na</sub>                    | Sodium channel slow inactivation gate                | 0.9941                   |
| X                                  | Potassium channel activation gate                    | $1.1212 \times 10^{-4}$  |
| [Na <sup>+</sup> ] <sub>i</sub>    | Intracellular Na <sup>+</sup> concentration          | 8.2143                   |
| [K <sup>+</sup> ] <sub>i</sub>     | Intracellular K <sup>+</sup> concentration           | 150.8                    |
| [Ca <sup>2+</sup> ] <sub>i</sub>   | Intracellular Ca <sup>2+</sup> concentration         | $5.8653 \times 10^{-5}$  |
| [Ca <sup>2+</sup> ] <sub>NSR</sub> | Network SR Ca <sup>2+</sup> concentration            | 0.1948                   |
| [Ca <sup>2+</sup> ] <sub>JSR</sub> | Junctional SR Ca <sup>2+</sup> concentration         | 0.1948                   |
| [Ca <sup>2+</sup> ] <sub>SS</sub>  | Ca <sup>2+</sup> concentration in the subspace       | $7.057 \times 10^{-5}$   |
| [Ca <sup>2+</sup> ] <sub>m</sub>   | Mitochondrial free Ca <sup>2+</sup> concentration    | $1.1324 \times 10^{-4}$  |
| P <sub>C1</sub>                    | Fraction of RyR channels in P <sub>C1</sub> state    | 0.7525                   |
| P <sub>C2</sub>                    | Fraction of RyR channels in P <sub>C2</sub> state    | 0.2471                   |
| P <sub>O2</sub>                    | Fraction of RyR channels in P <sub>O2</sub> state    | $7.12 \times 10^{-11}$   |
| P <sub>O1</sub>                    | Fraction of RyR channels in P <sub>O1</sub> state    | $8.309 \times 10^{-5}$   |
| C <sub>0</sub>                     | L-type Ca <sup>2+</sup> channel closed – mode normal | 0.9991                   |
| C <sub>1</sub>                     | L-type Ca <sup>2+</sup> channel closed – mode normal | $8.175 \times 10^{-5}$   |
| C <sub>2</sub>                     | L-type Ca <sup>2+</sup> channel closed – mode normal | $2.508 \times 10^{-9}$   |
| C <sub>3</sub>                     | L-type Ca <sup>2+</sup> channel closed – mode normal | $3.421 \times 10^{-14}$  |
| C <sub>4</sub>                     | L-type Ca <sup>2+</sup> channel closed – mode normal | $1.749 \times 10^{-20}$  |
| O                                  | L-type Ca <sup>2+</sup> channel open – mode normal   | $2.624 \times 10^{-20}$  |
| C <sub>Ca0</sub>                   | L-type Ca <sup>2+</sup> channel closed – mode Ca     | $1.1328 \times 10^{-3}$  |
| C <sub>Ca1</sub>                   | L-type Ca <sup>2+</sup> channel closed – mode Ca     | $4.7591 \times 10^{-8}$  |
| C <sub>Ca2</sub>                   | L-type Ca <sup>2+</sup> channel closed – mode Ca     | $6.3826 \times 10^{-13}$ |
| C <sub>Ca3</sub>                   | L-type Ca <sup>2+</sup> channel closed – mode Ca     | $1.815 \times 10^{-15}$  |
| C <sub>Ca4</sub>                   | L-type Ca <sup>2+</sup> channel closed – mode Ca     | $3.712 \times 10^{-24}$  |
| O <sub>Ca</sub>                    | L-type Ca <sup>2+</sup> channel open – mode Ca       | 0                        |

|                                  |                                                        |                           |
|----------------------------------|--------------------------------------------------------|---------------------------|
| y                                | ICa inactivation gate                                  | 0.9479                    |
| [LTRPNCa]                        | Ca <sup>2+</sup> bound to low affinity troponin sites  | 0.008949                  |
| [HTRPNCa]                        | Ca <sup>2+</sup> bound to high affinity troponin sites | 0.1321                    |
| [N <sub>0</sub> ]                | Nonpermissive tropomyosyn with 0 cross bridges         | 0.9979                    |
| [N <sub>1</sub> ]                | Nonpermissive tropomyosyn with 1 cross bridges         | 2.243 × 10 <sup>-5</sup>  |
| [P <sub>0</sub> ]                | Permissive tropomyosyn with 0 cross bridges            | 2.601 × 10 <sup>-5</sup>  |
| [P <sub>1</sub> ]                | Permissive tropomyosyn with 1 cross bridges            | 2.248 × 10 <sup>-5</sup>  |
| [P <sub>2</sub> ]                | Permissive tropomyosyn with 2 cross bridges            | 4.199 × 10 <sup>-5</sup>  |
| [P <sub>3</sub> ]                | Permissive tropomyosyn with 3 cross bridges            | 3.657 × 10 <sup>-5</sup>  |
| [ATP] <sub>i</sub>               | EC coupling linked ATP concentration                   | 7.8707                    |
| [ADP] <sub>i</sub>               | EC coupling linked ADP concentration                   | 0.1293                    |
| [ATP] <sub>ic</sub>              | Cytosolic ATP concentration not linked to EC coupling  | 7.7107                    |
| [ADP] <sub>ic</sub>              | Cytosolic ADP concentration not linked to EC coupling  | 0.2893                    |
| [CrP] <sub>i</sub>               | Mitochondrial linked creatine phosphate concentration  | 5.0297                    |
| [CrP] <sub>ic</sub>              | Cytosolic creatine phosphate concentration             | 5.1291                    |
| [ADP] <sub>m</sub>               | Mitochondrial ADP concentration                        | 0.0477                    |
| [NADH]                           | Mitochondrial NADH concentration                       | 9.0403                    |
| ΔΨ <sub>m</sub>                  | Inner mitochondrial membrane potential                 | - 126.7                   |
| [ISOC]                           | Isocitrate concentration (mitochondrial)               | 0.6241                    |
| [αKG]                            | α ketoglutarate concentration (mitochondrial)          | 7.0596 × 10 <sup>-5</sup> |
| [SCoA]                           | Succinyl CoA concentration (mitochondrial)             | 0.7058                    |
| [Suc]                            | Succinate concentration (mitochondrial)                | 2.2406 × 10 <sup>-4</sup> |
| [FUM]                            | Fumarate concentration (mitochondrial)                 | 0.01282                   |
| [MAL]                            | Malate concentration (mitochondrial)                   | 0.006316                  |
| [OAA]                            | Oxalacetate concentration (mitochondrial)              | 6.6423 × 10 <sup>-8</sup> |
| [ROS] <sub>i</sub>               | ROS concentration (cytoplasmic)                        | 6.6192 × 10 <sup>-7</sup> |
| [ROS] <sub>m</sub>               | ROS concentration (mitochondrial)                      | 0.2838                    |
| [H <sub>2</sub> O <sub>2</sub> ] | Hydrogen peroxide (cytoplasmic)                        | 4.6821 × 10 <sup>-7</sup> |
| [GSH]                            | Reduced glutathione (cytoplasmic)                      | 0.9981                    |

## References

1. Rice, J. J., M. S. Jafri, and R. L. Winslow. 2000. Modeling short-term interval-force relations in cardiac muscle. *Am J Physiol Heart Circ Physiol* 278:H913-931.
2. Luo, C. H., and Y. Rudy. 1994. A dynamic model of the cardiac ventricular action potential. I. Simulations of ionic currents and concentration changes. *Circ Res* 74:1071-1096.
3. Sheu, S. S., and H. A. Fozzard. 1982. Transmembrane Na<sup>+</sup> and Ca<sup>2+</sup> electrochemical gradients in cardiac muscle and their relationship to force development. *J Gen Physiol* 80:325-351.
4. Bers, D. M. 2001. *Excitation-contraction coupling and cardiac contractile force* Kluwer Academic Publishers, Dordrecht, Boston.
5. Rutter, G. A., and R. M. Denton. 1988. Regulation of NAD<sup>+</sup>-linked isocitrate dehydrogenase and 2-oxoglutarate dehydrogenase by Ca<sup>2+</sup> ions within toluene-permeabilized rat heart mitochondria. Interactions with regulation by adenine nucleotides and NADH/NAD<sup>+</sup> ratios. *Biochem J* 252:181-189.
6. Cortassa, S., M. A. Aon, E. Marban, R. L. Winslow, and B. O'Rourke. 2003. An integrated model of cardiac mitochondrial energy metabolism and calcium dynamics. *Biophys J* 84:2734-2755.
7. Balaban, R. S. 2002. Cardiac energy metabolism homeostasis: role of cytosolic calcium. *J Mol Cell Cardiol* 34:1259-1271.
8. Randle, P. J., and P. K. Tubbs. 1979. Carbohydrate and fatty acid metabolism. In *Handbook of Physiology*. R. M. Berne, N. Sperelakis, and R. Geiger, editors. American Physiological Society, Bethesda. 805-844.
9. Gunter, K. K., and T. E. Gunter. 1994. Transport of calcium by mitochondria. *J Bioenerg Biomembr* 26:471-485.
10. Gunter, T. E., and D. R. Pfeiffer. 1990. Mechanisms by which mitochondria transport calcium. *Am J Physiol* 258:C755-786.
